# Supplementary material for: Facile fabrication of a covalently-bonded carbon–sulfur composite from lignin for high-capacity potassium storage
Source: Royal Society of Chemistry journal article supplement (doi:10.1039/d5cc05748e), 2025-11-28
Supplement: d5cc05748e1.pdf [file d5cc05748e1.pdf]

Electronic Supplementary Information (ESI) for ChemComm.  
This journal is © The Royal Society of Chemistry 2025

## Electronic Supplementary Information

### **Facile Fabrication of Covalently-bonded Carbon-Sulfur Composite from Lignin for High-Capacity Potassium Storage**

Qing-Qing Yuan,<sup>†a</sup> Bai-Hua Huang,<sup>†a</sup> Yuen Yi Cao,<sup>a</sup> Shi-Rui Zhao<sup>a</sup>, Jia-Nan Ma,<sup>a</sup> Zi-Tong Yang,<sup>a</sup>  
Ji-Hao Wang,<sup>a</sup> Lin Liu,<sup>\*b, c</sup> De-Shan Bin<sup>\*a</sup>

<sup>a</sup> College of Chemistry and Materials Science, Guangdong Provincial Key Laboratory of Supramolecular  
Coordination Chemistry, Jinan University, Guangzhou 510632, China. E-mail: bindeshan@jnu.edu.cn

<sup>b</sup> School of Materials and Energy, Guangdong University of Technology, Guangzhou 510006, China.

<sup>c</sup> Key Laboratory of Advanced Energy Materials Chemistry (Ministry of Education), Nankai University,  
Tianjin 300071, China. E-mail: liulin0912@gdut.edu.cn

<sup>†</sup> Q.-Q. Yuan and B.-H. Huang contributed equally to this work.

## **Experimental Section**

### **Material Synthesis**

All reagents in this experiment were applied directly without any further purification. The C-S-450 composite was synthesized via a one-step pyrolysis process: a mixture of lignin (dealkaline, Mucklin, AR) and cyclo-S<sub>8</sub> in a mass ratio of 1:4 was thoroughly ground in a mortar and then carbonized at 450 °C under an argon atmosphere in a tubular furnace. For comparison, the C-450 sample without sulfur was obtained by direct pyrolysis of pristine lignin under identical conditions. The C-450/S<sub>8</sub> composite was prepared through a melt-diffusion method by uniformly grinding C-450 with cyclo-S<sub>8</sub> at a mass ratio of 73:27, sealing the mixture in an evacuated glass tube, and heating at 155 °C for 12 hours.

### **Material Characterization**

Scanning electron microscopy (SEM) images were collected from a Hitachi FlexSEM1000 II. Transmission electron microscopy (TEM) images were collected from a JEOL JEM-2100F. Raman spectra were performed with a HORIBA LabRAM HR Evolution spectrometer with an excitation wavelength of 532 nm. Fourier transform infrared (FTIR) spectra were acquired on a Thermo 1701383S. Powder X-ray diffraction (PXRD) analysis was carried out on a miniflex600 diffractometer (Rigaku) with Cu K $\alpha$  radiation, scanning at a rate of 10° min<sup>-1</sup>. Thermogravimetric analysis (TGA) was conducted using a Mettler-Toledo TGA2 in N<sub>2</sub> atmosphere, with a heating rate of 10 °C min<sup>-1</sup>. For X-ray photoelectron spectroscopy (XPS), data were collected with a Thermo Scientific K-Alpha+. The C-S-450 electrodes for SEM tests were carefully extracted from the disassembled cells inside a glovebox filled with argon (The content of O<sub>2</sub> and H<sub>2</sub>O was below 0.1 ppm), followed by rinsing with the solvent diethyl carbonate (DEC) to remove residual salts.

### **Electrochemical Measurements**

The C-S-450 composite and the reference sample C-450 were used as active materials for battery tests. The electrode slurry was prepared by thoroughly mixing the active material, Super P, and a binder (consisting of sodium carboxymethyl cellulose and styrene-butadiene rubber in a 1:1 mass ratio) at a mass ratio of 7:2:1. After degassing, the slurry was coated onto a copper current collector and vacuum-dried at 60 °C for 12 hours. The mass loading of the active material was controlled within the range of 1.0~2.0 mg cm<sup>-2</sup>. Metallic potassium (Sigma Ltd.) served as the

counter electrode in the K-ion batteries, with glass fiber (Whatman) used as the separator. The electrolyte for electrochemical testing consisted of 5 M potassium bis(fluorosulfonyl)imide (KFSI) dissolved in ethylene carbonate (EC) and enthyl methyl carbonate (EMC), (v/v, 1:1). All CR2032 coin cells were assembled in an argon-filled glove box with both H<sub>2</sub>O and O<sub>2</sub> contents maintained below 0.1 ppm. Galvanostatic charge/discharge tests were conducted at room temperature (~25 °C) with a Land battery testing system. Specific capacity values were calculated based on the total mass of C-S-450 or C-450 active materials, with tests performed with a voltage window of 0.01~3.0 V. The separator for Li-S batteries tests was polypropylene diaphragm (PP diaphragm), and the ester- and ether-based electrolyte were purchased with 1 M LiPF<sub>6</sub>, EC: DEC (v/v, 1:1), 5% FEC and 1 M LiTFSI DME: DOL (v/v, 1:1), 2% LiNO<sub>3</sub>. Cyclic voltammetry (CV) and electrochemical impedance spectroscopy (EIS) measurements were carried out on an electrochemical workstation (CHI 760E).

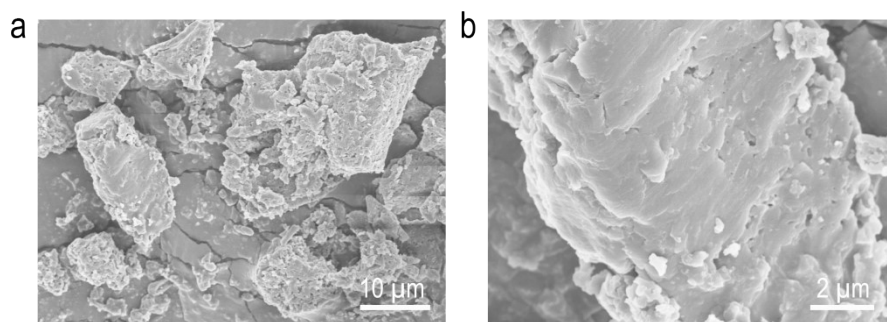

**Fig. S1.** (a-b) SEM images of pristine lignin.

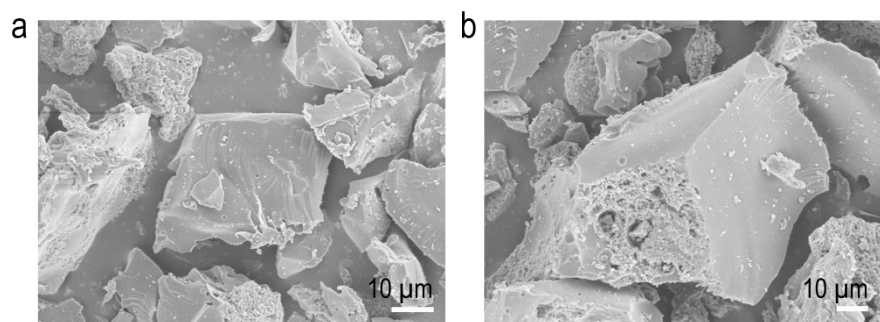

**Fig. S2.** (a-b) SEM images of C-S-450.

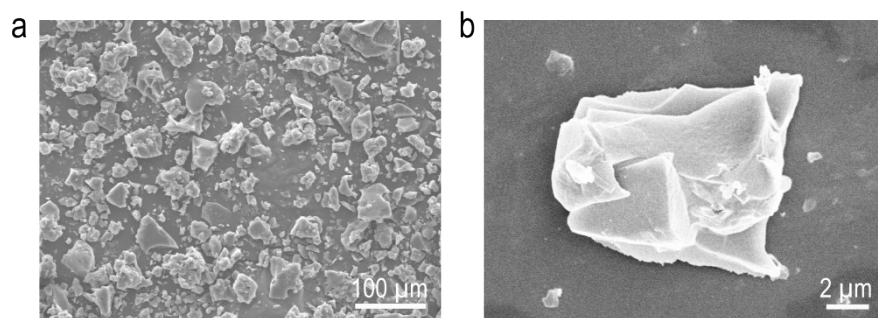

**Fig. S3.** (a-b) SEM images of C-450.

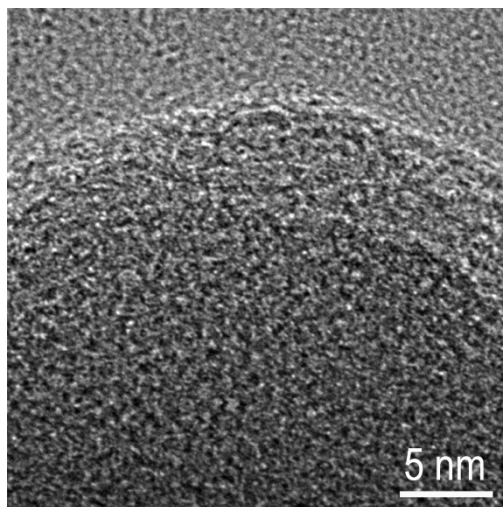

**Fig. S4.** HRTEM image of C-S-450.

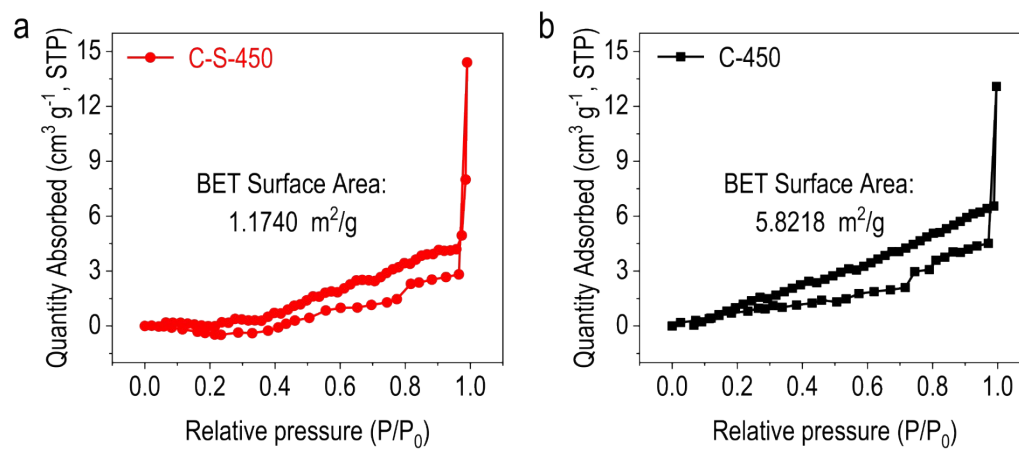

**Fig. S5.** N<sub>2</sub> adsorption and desorption isotherms of C-S-450 and C-450.



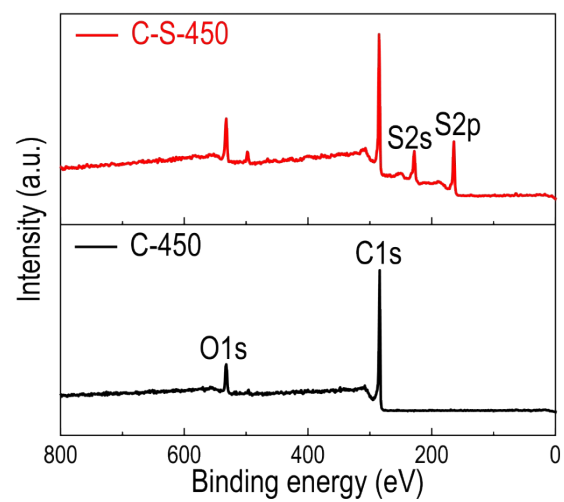

**Fig. S6.** XPS survey spectra of C-S-450 and C-450.

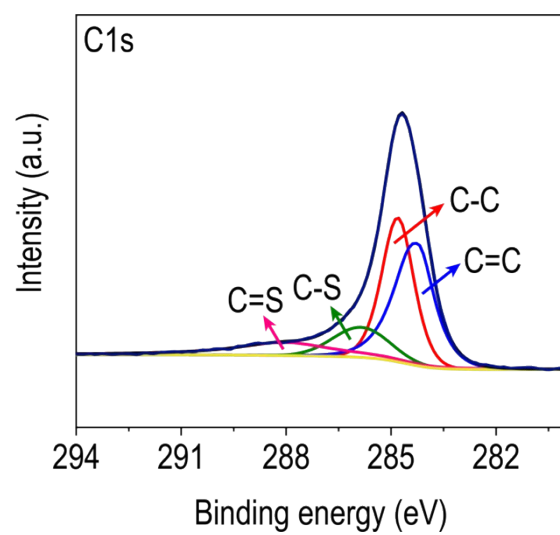

**Fig. S7.** High-resolution XPS spectra of C1s for C-S-450.

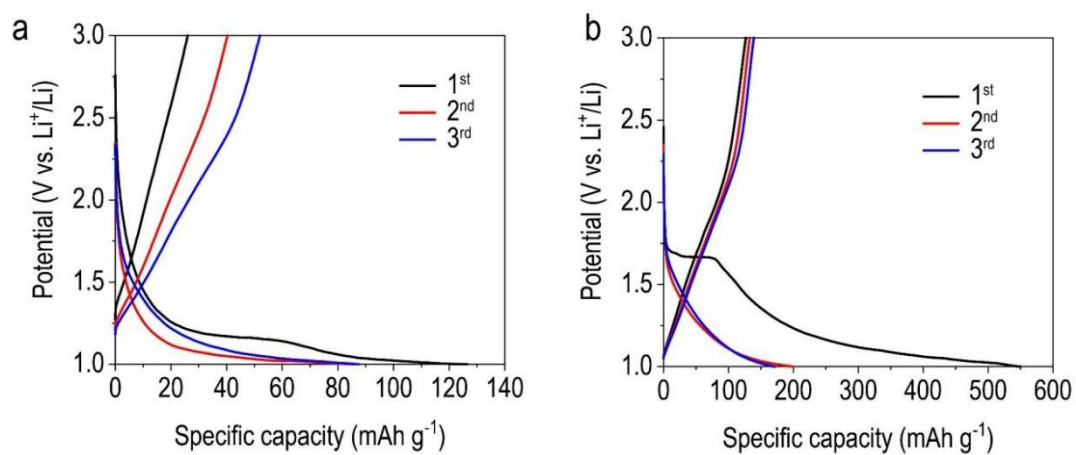

**Fig. S8.** (a) The first third charge-discharge curves of C-S-450 at 0.06 A g<sup>-1</sup> using ester-based electrolyte. (b) The first third charge-discharge curves of C-S-450 at 0.06 A g<sup>-1</sup> using ether-based electrolyte.

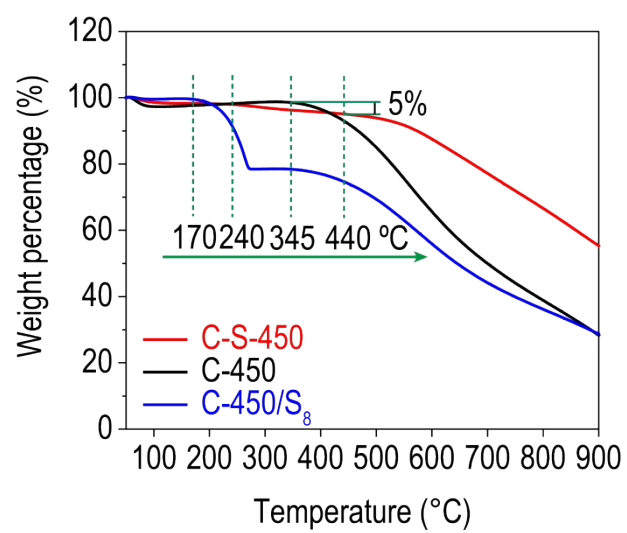

**Fig. S9.** TGA curves of C-S-450, C-450, and C-450/S<sub>8</sub>.

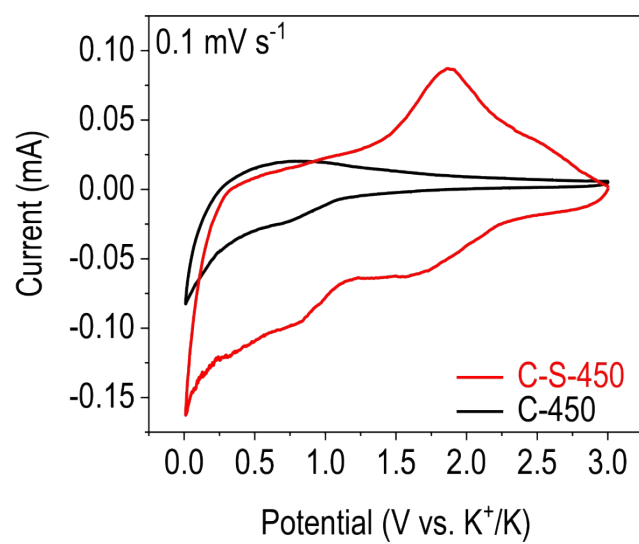

**Fig. S10.** CV curves of C-S-450 and C-450 at 0.1 mV s<sup>-1</sup> for the second cycle.

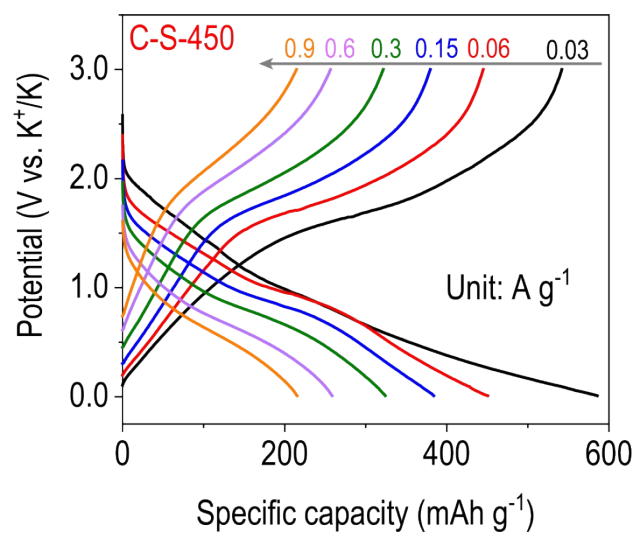

**Fig. S11.** The charge-discharge profiles of C-S-450 at different current densities.

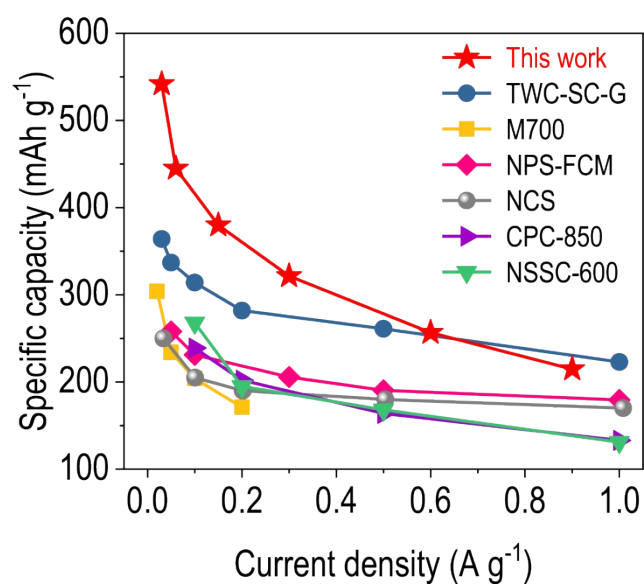

**Fig. S12.** Comparison of rate performance of C-S-450 with the reported biomass-derived carbon anodes for KIBs.<sup>1-6</sup>

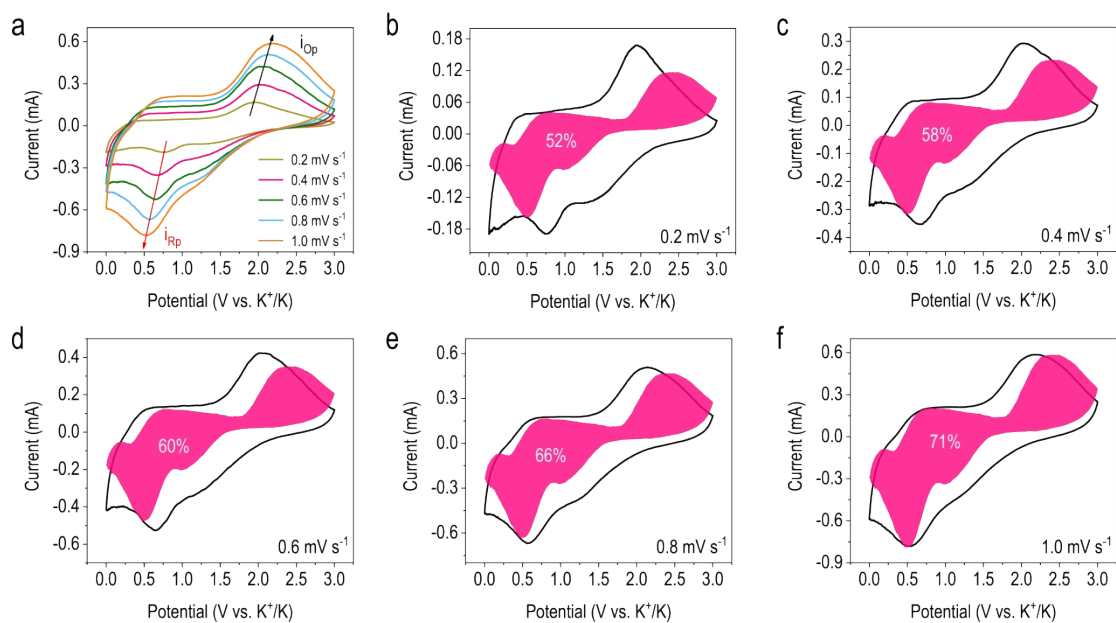

**Fig. S13.** (a) CV curves of C-S-450 at varying scan rates of 0.2-1.0 mV s<sup>-1</sup>. (b-f) Contribution of capacitive process at varying scan rates: (b) 0.2 mV s<sup>-1</sup>. (c) 0.4 mV s<sup>-1</sup>. (d) 0.6 mV s<sup>-1</sup>. (e) 0.8 mV s<sup>-1</sup>. (f) 1.0 mV s<sup>-1</sup>.



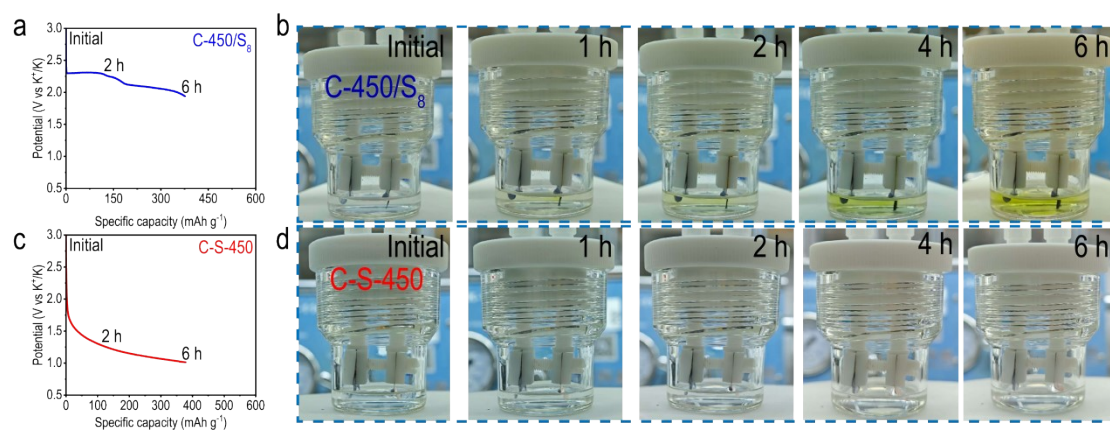

**Fig. S14.** (a, c) Discharge profiles of C-450/S<sub>8</sub> (a) and C-S-450 (c). (b, d) Optical photos of beaker cells based on C-450/S<sub>8</sub> (b) and C-S-450 (d). The K metal was used as counter electrode.

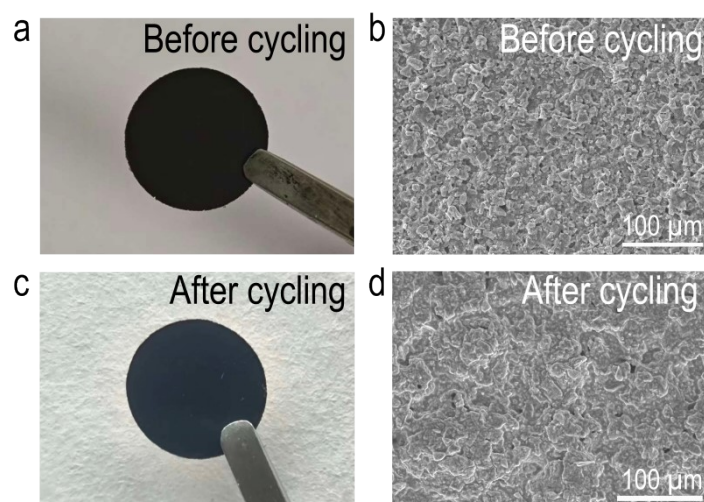

**Fig. S15.** (a-b) The optical photo (a) and SEM image (b) of C-S-450 electrode before cycling. (c-d) The optical photo (c) and SEM image (d) of C-S-450 electrode after cycling more than 150 cycles at  $0.9 \text{ A g}^{-1}$ .

## Notes and References

- 1 Z. Tang, Y. Wang, Z. Zheng and X. Luo, *J. Mater. Chem. A*, 2021, **9**, 9191-9202.
- 2 Z. Wu, J. Zou, Y. Zhang, X. Lin, D. Fry, L. Wang and J. Liu, *Chem. Eng. J.*, 2022, **427**, 131547.
- 3 X. Zhang, R. Huang, F. Wu, R. Chen and L. Li, *Nano Energy*, 2023, **117**, 108913.
- 4 C. Chen, Z. Wang, B. Zhang, L. Miao, J. Cai, L. Peng, Y. Huang, J. Jiang, Y. Huang, L. Zhang and J. Xie, *Energy Storage Mater.*, 2017, **8**, 161-168.
- 5 M. Yang, J. Dai, M. He, T. Duan and W. Yao, *J. Colloid Interface Sci.*, 2020, **567**, 256-263.
- 6 M. Kim, L. Ma, Z. Li, W. Mai, N. Amiralian, A. E. Rowan, Y. Yamauchi, A. Qin, R. A. Afzal, D. Martin, A. K. Nanjundan and J. Li, *J. Mater. Chem. A*, 2023, **11**, 16626-16635.
